# Supplementary material for: Factors Influencing US Allopathic Medical Students to Choose Pathology as a Specialty
Source: PubMed Central journal article supplement — Acad Pathol. 2020 Sep 14;7:2374289520951924. doi: 10.1177/2374289520951924 (PMC7557358; doi:10.1177/2374289520951924), 2020-09-14
Supplement: Supplemental_Table.pdf [file Supplemental_Table.pdf]

**Supplemental Table 1**

Number/Percent of Respondents Selecting of NA/Don't Know Enough Responses

| Please rate your level of agreement with each of the following statements concerning pathology. | Total Number Responded to Question | Response - <i>NA/Don't know enough about pathology to answer</i> |                  |
|-------------------------------------------------------------------------------------------------|------------------------------------|------------------------------------------------------------------|------------------|
|                                                                                                 |                                    | Number Selected                                                  | Percent Selected |
| Pathology residents have high job satisfaction                                                  | 344                                | 198                                                              | 58%              |
| The pathology job market is strong                                                              | 344                                | 183                                                              | 53%              |
| Pathology attendings have high job satisfaction                                                 | 344                                | 171                                                              | 50%              |
| The time and workload demands of a pathology residency are reasonable                           | 343                                | 143                                                              | 42%              |
| Information on social media about pathology is encouraging                                      | 343                                | 128                                                              | 37%              |
| Pathologists have good income potential                                                         | 343                                | 123                                                              | 36%              |
| Pathology offers the flexibility to work part-time                                              | 343                                | 102                                                              | 30%              |
| The average pathologist spends the majority of his/her time performing autopsies                | 343                                | 81                                                               | 24%              |
| Pathologists have good work-life balance                                                        | 343                                | 78                                                               | 23%              |
| Pathology offers the opportunity to utilize new technologies                                    | 343                                | 41                                                               | 12%              |
| Pathology offers adequate scholarly and research opportunities                                  | 343                                | 36                                                               | 10%              |
| Pathology is a highly regarded specialty                                                        | 343                                | 30                                                               | 9%               |
| Pathologists are introverts                                                                     | 343                                | 30                                                               | 9%               |
| Pathology offers a satisfying degree of intellectual challenge                                  | 341                                | 30                                                               | 9%               |
| Pathologists at my institution attempted to recruit me to pathology                             | 344                                | 24                                                               | 7%               |
| Pathology has limited opportunities for direct patient contact compared to other specialties    | 343                                | 20                                                               | 6%               |
| I understand the job activities of a pathologist                                                | 344                                | 5                                                                | 1%               |
| I received adequate pathology education in my first two years of medical school                 | 344                                | 2                                                                | 1%               |
| I was sufficiently exposed to pathology in medical school to consider it as a career choice     | 343                                | 2                                                                | 1%               |
